# Supplementary material for: Adherence to a Mediterranean diet and Alzheimer's disease risk in an Australian population
Source: PubMed Central journal article supplement — Transl Psychiatry. 2012 Oct 2;2(10):e164–. doi: 10.1038/tp.2012.91 (PMC3565821; doi:10.1038/tp.2012.91), 2012-10-02
Supplement: tp201291x1.pdf [file tp201291x1.pdf]

## Supplementary Data

Table 1 AD, MCI and HC demographic and clinical characteristics by MeDi score tertile

| <i>Characteristics</i>                    | <i>Low Tertile</i>             | <i>Middle Tertile</i>          | <i>High Tertile</i>            | <i>P Value<sup>a</sup></i> |
|-------------------------------------------|--------------------------------|--------------------------------|--------------------------------|----------------------------|
|                                           | <i>(MeDi Score 0-3; n=289)</i> | <i>(MeDi Score 4-5; n=428)</i> | <i>(MeDi Score 6-9; n=253)</i> |                            |
| Age, years; mean (s.d.)                   | 72.77 (8.09)                   | 71.16 (7.35)                   | 69.57 (6.80)                   | <b>0.000</b>               |
| Gender, men; no. (%)                      | 117 (40)                       | 179 (42)                       | 111 (44)                       | 0.726                      |
| Education ≤ 12 years; no. (%)             | 145 (50)                       | 222 (52)                       | 110 (43)                       | 0.098                      |
| MMSE; mean (s.d.)                         | 26 (4.98)                      | 27 (4.37)                      | 28 (3.18)                      | <b>0.000</b>               |
| Presence of APOE ε4 allele; no. (%)       | 105 (36)                       | 139 (32)                       | 87 (34)                        | 0.563                      |
| Energy Intake, Kcal; mean (s.d.)          | 1657 (630)                     | 1719 (616)                     | 1696 (531)                     | 0.393                      |
| Body mass index; mean (s.d.) <sup>b</sup> | 25.75 (3.80)                   | 26.28 (4.37)                   | 26.41 (4.41)                   | 0.058                      |
| <i>Smoking; no. (%)</i>                   |                                |                                |                                |                            |
| Past                                      | 143 (49)                       | 184 (43)                       | 117 (46)                       | 0.228                      |
| Current                                   | 7 (2)                          | 12 (3)                         | 10 (4)                         | 0.555                      |
| Country of Birth, Australian; no. (%)     | 204 (71)                       | 308 (72)                       | 175 (69)                       | 0.737                      |
| Diabetes; no. (%) <sup>c</sup>            | 21 (7)                         | 34 (8)                         | 21 (8)                         | 0.900                      |
| Hypertension; no. (%) <sup>c</sup>        | 9 (41)                         | 169 (39)                       | 99 (39)                        | 0.866                      |
| Angina; no. (%) <sup>c</sup>              | 29 (10)                        | 20 (5)                         | 21 (8)                         | <b>0.018</b>               |
| Heart Attack; no. (%) <sup>c</sup>        | 15 (5)                         | 17 (4)                         | 18 (7)                         | 0.201                      |
| Stroke; no. (%) <sup>c</sup>              | 12 (4)                         | 11 (3)                         | 6 (2)                          | 0.662                      |

Abbreviations: AD, Alzheimer's disease; MCI, mild cognitive impairment; HC, healthy control; MeDi, Mediterranean diet; AIBL, Australian Imaging, Biomarkers and Lifestyle Study of Ageing; MMSE, Mini-Mental State Examination; APOE, apolipoprotein E; BMI, body mass index.

<sup>a</sup>Bold indicates statistical significance ( $p < 0.05$ ); Characteristics compared using analysis of variance for continuous variables and  $\chi^2$  for categorical variables. <sup>b</sup>BMI is calculated as weight in kilograms divided by height in meters squared. <sup>c</sup>History of diabetes, hypertension, angina, heart attack or stroke.

**Table 2 HC demographic and clinical characteristics by MeDi score tertile**

| <i>Characteristics</i>                | <i>Low Tertile</i>             | <i>Middle Tertile</i>          | <i>High Tertile</i>            | <i>P Value<sup>a</sup></i> |
|---------------------------------------|--------------------------------|--------------------------------|--------------------------------|----------------------------|
|                                       | <i>(MeDi Score 0-3; n=187)</i> | <i>(MeDi Score 4-5; n=319)</i> | <i>(MeDi Score 6-9; n=217)</i> |                            |
| Age, years; mean (s.d)                | 70.80 (7.56)                   | 70.24 (7.07)                   | 68.76 (6.05)                   | <b>0.007</b>               |
| Gender, men; no. (%)                  | 82(44)                         | 133 (42)                       | 88 (41)                        | 0.795                      |
| Education ≤ 12 years; no. (%)         | 86 (46)                        | 157 (49)                       | 92 (42)                        | 0.297                      |
| MMSE; mean (s.d)                      | 29 (1.20)                      | 29 (1.19)                      | 29 (1.18)                      | 0.628                      |
| Presence of APOE ε4 allele; no. (%)   | 42 (22)                        | 77 (24)                        | 67 (31)                        | 0.107                      |
| Energy Intake, Kcal; mean (s.d)       | 1686 (657)                     | 1688 (593)                     | 1699 (539)                     | 0.971                      |
| BMI; mean (s.d) <sup>b</sup>          | 26.17 (3.68)                   | 26.57 (4.30)                   | 26.50 (4.48)                   | 0.571                      |
| <i>Smoking; no. (%)</i>               |                                |                                |                                |                            |
| Past                                  | 93 (26)                        | 130 (41)                       | 96 (44)                        | 0.145                      |
| Current                               | 5 (3)                          | 11 (3)                         | 9 (4)                          | 0.721                      |
| Country of Birth, Australian; no. (%) | 138 (74)                       | 231 (72)                       | 150 (69)                       | 0.550                      |
| Diabetes; no. (%) <sup>c</sup>        | 11 (9)                         | 22 (7)                         | 18 (8)                         | 0.633                      |
| Hypertension; no. (%) <sup>c</sup>    | 76 (41)                        | 129 (40)                       | 87 (40)                        | 0.993                      |
| Angina; no. (%) <sup>c</sup>          | 12 (6)                         | 14 (4)                         | 17 (8)                         | 0.242                      |
| Heart Attack; no. (%) <sup>c</sup>    | 9 (5)                          | 12 (4)                         | 12 (6)                         | 0.618                      |
| Stroke; no. (%) <sup>c</sup>          | 3 (2)                          | 7 (2)                          | 4 (2)                          | 0.891                      |

Abbreviations: AD, Alzheimer's disease; MCI, mild cognitive impairment; HC, healthy control; MeDi, Mediterranean diet; AIBL, Australian Imaging, Biomarkers and Lifestyle Study of Ageing; MMSE, Mini-Mental State Examination; APOE, apolipoprotein E; BMI, body mass index.

<sup>a</sup>Bold indicates statistical significance ( $p < 0.05$ ); Characteristics compared using analysis of variance for continuous variables and  $\chi^2$  for categorical variables. <sup>b</sup>BMI is calculated as weight in kilograms divided by height in meters squared. <sup>c</sup>History of diabetes, hypertension, angina, heart attack or stroke.

When the MeDi tertiles are analysed with all three classification groups included, age, mean MMSE score and history of angina are significantly different between the tertiles (Table 1).

When healthy controls are evaluated independently of AD and MCI subjects, age is the only significantly different characteristic between the MeDi tertiles (Table 2).
